# Supplementary material for: Social Value of Baby-Friendly Hospital Initiative Implementation in Australia: Case Study
Source: Research Square preprint supplement (doi:10.21203/rs.3.rs-97226/v1), 2020-10-28
Supplement: Supplementary file 1 [file b69d0119b8ef87235cfae115.docx]

**Appendix 1**

Cost associated to BFHI accreditation

| **Ten Steps** | **Category** | **Amount** |  |  | **Per year** | **Per 3 year** |
| --- | --- | --- | --- | --- | --- | --- |
|  | BFHI Application fee | $ 9,380.00 | every 3 year |  | $ 3,126.67 | $ 9,380.00 |
|  | Lunch for the assessor | $ 150.00 |  |  | $ 50.00 | $ 150.00 |
| Step 1b | Policy revision | $ 52.00 | per hour |  | $ 26.00 | $ 78.00 |
| Policy communication to parents (printing and laminating cost) | $ 9.19 | per pc | Commercial price based on Officeworks | $ 30.63 | $ 91.90 |
| Step 1c | BFHI Monitoring system | $ 31.00 | per hour | 1-2 hours/every 6 months (83) | $ 124.00 | $ 372.00 |
| Step 2 | Staff training group 1 | $ 66.00 | per person | 100 staffs | $ 2,200.00 | $ 6,600.00 |
| Printing cost for supervised clinical practice record book | $ 2.88 | per booklet | Commercial price based on Officeworks | $ 96.00 | $ 288.00 |
| Step 3 | Educator fee for antenatal class | $ 31.00 | per hour | level 2 staff; 2 hours duration each class | $ 744.00 | $ 2,232.00 |
| Printing cost for educational material (fact sheets) | $ 0.69 | per side | Commercial price based on Officeworks | $ 1,380.00 | $ 4,140.00 |
| Step 5 | Nipple shield | $ 28.00 | each | Commercial price based on Chemist Warehouse | $ 1,400.00 | $ 4,200.00 |
| Pill-cups for cupfeeding | $ 1.00 | each | Commercial price based on Medela | $ 50.00 | $ 150.00 |
| Hospital grade breastpump | $ 244.59 | each | Commercial price based on Nursing Angel | $ 81.53 | $ 244.59 |
| Step 6 | Sucrose 24% | $ 55.00 | each | Data from interview | $ 13,750.00 | $ 41,250.00 |
| Formula NAN Pro 1 Gold | $ 16.00 | per tin | Data from interview | $ 240.00 | $ 720.00 |
| Formula Pre NAN LBW RTF | $ 48.00 | per tin | Data from interview | $ 720.00 | $ 2,160.00 |
| 1ml and 2ml syringe | $ 1.00 | each | Data from interview | $ 150.00 | $ 450.00 |
| medicine cups | $ 1.00 | each | Data from interview | $ 75.00 | $ 225.00 |
| Step 7 | Rotary cottage (parents’ accommodation) | $ 40.00 | per night | paid by the patients |  |  |
| Rooming-in room | $ 362.00 (public patient) | per night | paid by the patients |  |  |
| $ 660.00 (private patient) | per night | paid by the patients |  |  |
| Recliner for accompanying father in special care nursery | $ 478.00 | each | Commercial price based on Amart furniture | $ 159.33 | $ 478.00 |
| Step 8 | Early feeding cues poster | $ 9.19 | per pc | Commercial price based on Officeworks | $ 30.63 | $ 91.90 |
| Step 9 | Counsel on the risk and use of pacifier and teat bottle |  |  | integrated with Step 3 |  |  |
| Step 10 | Home visit | $ 31.00 | per hour | Level 1 or 2 | $ 62,000.00 | $ 186,000.00 |
|  |  |  |  | Grand Total | **$ 86,433.80** | **$ 259,301.39** |
